# Supplementary material for: Optical and structural characterization of cerium doped LYSO sol–gel polycrystal films: potential application as scintillator panel for X-ray imaging
Source: Royal Society of Chemistry journal article supplement (doi:10.1039/c1jm10492f), 2011-01-01

Supplementary Material: Image recorded by irradiating with soft X-ray: a screw in a Czochralski thick sample (3x2x0.2 cm)

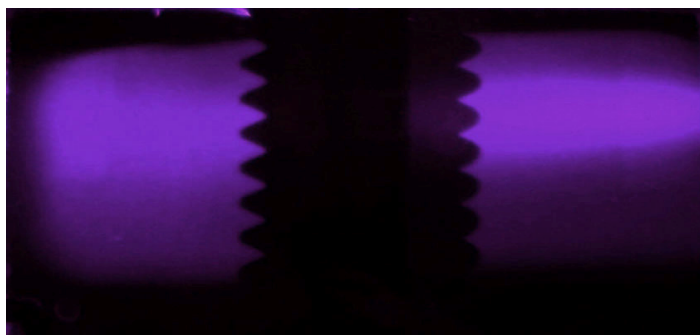

Supplement: c1jm10492f.pdf [file c1jm10492f.pdf]
